# Supplementary material for: Analgesic effect of local anaesthetic in haemorrhoid banding: systematic review and meta-analysis
Source: Springer Nature journal article supplement (doi:10.1007/s00384-024-04609-8), 2024-03-04
Supplement: MOESM1 [file 26808580]

**Journal:** International Journal of Colorectal Disease

**Article title:** Analgesic effect of local anaesthetic in haemorrhoid banding: systematic review and meta-analysis

**Authors:** Eleanor G R Watson<sup>1\*</sup>, Hwa Ian Ong<sup>2</sup>, Nicholas J W Shearer<sup>3</sup>, Philip J Smart<sup>2</sup>, Adele N Burgess<sup>2</sup>, David M Proud<sup>2</sup>, Helen M Mohan<sup>2</sup>

<sup>1</sup>University of Melbourne (Faculty of Medicine, Dentistry and Health Sciences), Melbourne (VIC), Australia.

<sup>2</sup>Austin Hospital (Department of Surgery), Melbourne (VIC), Australia.

<sup>3</sup>Royal Melbourne Hospital (Department of Anaesthesia), Melbourne (VIC), Australia.

\*Corresponding author

E-mail: [egwatson@student.unimelb.edu.au](mailto:egwatson@student.unimelb.edu.au)

ORCID: 0000-0003-3614-5132

Twitter: @dreleanorwatson

| <input type="checkbox"/> | # ▲ | Searches                                                                                                                                | Results |
|--------------------------|-----|-----------------------------------------------------------------------------------------------------------------------------------------|---------|
| <input type="checkbox"/> | 1   | Ligation/                                                                                                                               | 24430   |
| <input type="checkbox"/> | 2   | ((haemorrhoid* or hemorrhoid* or of hemorrhoid* or of haemorrhoid*) adj3 band*).tw,kf.                                                  | 185     |
| <input type="checkbox"/> | 3   | ((haemorrhoid* or hemorrhoid* or band* or rubber band*) adj3 ligation).tw,kf.                                                           | 1764    |
| <input type="checkbox"/> | 4   | 1 or 2 or 3                                                                                                                             | 25191   |
| <input type="checkbox"/> | 5   | Hemorrhoids/                                                                                                                            | 5465    |
| <input type="checkbox"/> | 6   | (hemorrhoid* or haemorrhoid* or piles).tw,kf.                                                                                           | 8418    |
| <input type="checkbox"/> | 7   | 5 or 6                                                                                                                                  | 9394    |
| <input type="checkbox"/> | 8   | exp Anesthetics, Local/                                                                                                                 | 109836  |
| <input type="checkbox"/> | 9   | Anesthesia, Local/                                                                                                                      | 18116   |
| <input type="checkbox"/> | 10  | *Nerve Block/                                                                                                                           | 15955   |
| <input type="checkbox"/> | 11  | Pudendal Nerve/                                                                                                                         | 516     |
| <input type="checkbox"/> | 12  | (pudendal nerve block* or nerve block* or pudendal nerve or regional anesthetic* or regional anaesthetic* or regional analgesia).tw,kf. | 17828   |
| <input type="checkbox"/> | 13  | (anesthesia or anaesthesia or anesthetic* or anaesthetic* or local anesthetic* or local anaesthetic* or local analgesia).tw,kf.         | 306469  |
| <input type="checkbox"/> | 14  | (lignocaine or lidocaine or ropivacaine or bupivacaine).tw,kf.                                                                          | 42440   |
| <input type="checkbox"/> | 15  | 8 or 9 or 10 or 11 or 12 or 13 or 14                                                                                                    | 401236  |
| <input type="checkbox"/> | 16  | 4 and 7 and 15                                                                                                                          | 88      |
