# Supplementary material for: Analgesic effect of local anaesthetic in haemorrhoid banding: systematic review and meta-analysis
Source: Springer Nature journal article supplement (doi:10.1007/s00384-024-04609-8), 2024-03-04
Supplement: MOESM2 [file 26808580]

**Journal:** International Journal of Colorectal Disease

**Article title:** Analgesic effect of local anaesthetic in haemorrhoid banding: systematic review and meta-analysis

**Authors:** Eleanor G R Watson<sup>1\*</sup>, Hwa Ian Ong<sup>2</sup>, Nicholas J W Shearer<sup>3</sup>, Philip J Smart<sup>2</sup>, Adele N Burgess<sup>2</sup>, David M Proud<sup>2</sup>, Helen M Mohan<sup>2</sup>

<sup>1</sup>University of Melbourne (Faculty of Medicine, Dentistry and Health Sciences), Melbourne (VIC), Australia.

<sup>2</sup>Austin Hospital (Department of Surgery), Melbourne (VIC), Australia.

<sup>3</sup>Royal Melbourne Hospital (Department of Anaesthesia), Melbourne (VIC), Australia.

\*Corresponding author

E-mail: [egwatson@student.unimelb.edu.au](mailto:egwatson@student.unimelb.edu.au)

ORCID: 0000-0003-3614-5132

Twitter: @dreleanorwatson

| First author | Article title                                                                                                                 | Publication year | Publication language | Country of study | Type of control                            | Intervention                                                                                  | Blinding                                          | Participant no. (intervention, control) | Follow-up period | Pain scale                      |
|--------------|-------------------------------------------------------------------------------------------------------------------------------|------------------|----------------------|------------------|--------------------------------------------|-----------------------------------------------------------------------------------------------|---------------------------------------------------|-----------------------------------------|------------------|---------------------------------|
| Baloch       | Effectiveness of Bupivacaine after Rubber Band Ligation of Haemorrhoids for Post-Procedure Pain                               | 2007             | English              | Pakistan         | Non-placebo                                | 2mL 0.5% bupivacaine injected into banded tissue after RBL                                    | Double-blind                                      | 60 (30, 30)                             | 2 hours          | 10-point visual analogue scale  |
| Gokalp       | A prospective randomised study of local anaesthetic injection after multiple rubber band ligation of haemorrhoids             | 2004             | English              | Turkey           | Non-placebo                                | 1-2mL 0.5% bupivacaine with 1:200000 epinephrine injected proximal to band after RBL          | Participants blinded, investigators not specified | 142 (70, 72)                            | 10 days          | 10-point visual analogue scale  |
| Hooker       | Local Injection of Bupivacaine After Rubber Band Ligation of Hemorrhoids                                                      | 1999             | English              | Canada           | Non-placebo and placebo (saline injection) | 0.5mL 0.5% bupivacaine with 1:200,000 epinephrine injected post RBL                           | Double-blind                                      | 115 (42, 31 non-placebo; 42 placebo)    | 1 week           | 100-point linear analogue scale |
| Kwok         | The use of local anaesthesia in haemorrhoidal banding: a randomized controlled trial                                          | 2013             | English              | New Zealand      | Non-placebo                                | 1mL 0.5% bupivacaine, injected just proximal to band                                          | Single-blind                                      | 72 (40, 32)                             | 24 hours         | 10-point visual analogue scale  |
| Law          | Triple rubber band ligation for haemorrhoids: Prospective, randomized trial of use of local anesthetic injection              | 1999             | English              | Hong Kong        | Non-placebo                                | 1-2mL 2% lignocaine injected into banded tissue after RBL                                     | Investigators blinded, participants not specified | 101 (62, 39)                            | 6 weeks          | 4-point categorical scale       |
| Sharma       | The use of topical anaesthetic in the banding of internal haemorrhoids: a feasibility study for a randomised controlled trial | 2022             | English              | United Kingdom   | Non-placebo                                | 11mL 230mg lignocaine hydrochloride gel, applied around haemorrhoid base 5 minutes before RBL | Single-blind                                      | 35 (18, 17)                             | 72 hours         | 10-point visual analogue scale  |
| Williams     | An Assessment of Anesthetic-Steroid Suppositories: A controlled trial following rubber-band ligation of haemorrhoids          | 1972             | English              | United Kingdom   | Placebo (inert suppository)                | PR insertion of 2 suppositories containing hydrocortisone, cinchocaine and framycetin         | Double-blind                                      | 20 (crossover trial)                    | Not specified    | Pain / no pain (binary outcome) |

Note. RBL = rubber band ligation. Not all studies reported the exact timing or location of anaesthetic administration, or strength of the anaesthetic; the available information is presented.
