# Supplementary material for: Analgesic effect of local anaesthetic in haemorrhoid banding: systematic review and meta-analysis
Source: Springer Nature journal article supplement (doi:10.1007/s00384-024-04609-8), 2024-03-04
Supplement: MOESM3 [file 26808580]

**Journal:** International Journal of Colorectal Disease

**Article title:** Analgesic effect of local anaesthetic in haemorrhoid banding: systematic review and meta-analysis

**Authors:** Eleanor G R Watson<sup>1\*</sup>, Hwa Ian Ong<sup>2</sup>, Nicholas J W Shearer<sup>3</sup>, Philip J Smart<sup>2</sup>, Adele N Burgess<sup>2</sup>, David M Proud<sup>2</sup>, Helen M Mohan<sup>2</sup>

<sup>1</sup>University of Melbourne (Faculty of Medicine, Dentistry and Health Sciences), Melbourne (VIC), Australia.

<sup>2</sup>Austin Hospital (Department of Surgery), Melbourne (VIC), Australia.

<sup>3</sup>Royal Melbourne Hospital (Department of Anaesthesia), Melbourne (VIC), Australia.

\*Corresponding author

E-mail: [egwatson@student.unimelb.edu.au](mailto:egwatson@student.unimelb.edu.au)

ORCID: 0000-0003-3614-5132

Twitter: @dreleanorwatson

**Population:** patients undergoing haemorrhoid banding

**Intervention:** local anaesthetic

**Comparison:** no local anaesthetic

**Outcome:** post-procedural pain

| Certainty assessment                          |                   |              |                      |              |                           |                      | N <sub>2</sub> of patients |                      | Effect                                              | Certainty                                                                                  | Importance |
|-----------------------------------------------|-------------------|--------------|----------------------|--------------|---------------------------|----------------------|----------------------------|----------------------|-----------------------------------------------------|--------------------------------------------------------------------------------------------|------------|
| N <sub>2</sub> of studies                     | Study design      | Risk of bias | Inconsistency        | Indirectness | Imprecision               | Other considerations | local anaesthetic          | no local anaesthetic | Absolute (95% CI)                                   |                                                                                            |            |
| <b>Pain at 1 hour (Scale from: 0 to 10)</b>   |                   |              |                      |              |                           |                      |                            |                      |                                                     |                                                                                            |            |
| 5                                             | randomised trials | not serious  | serious <sup>a</sup> | not serious  | serious <sup>b</sup>      | none                 | 175                        | 167                  | MD <b>1.43 lower</b><br>(2.3 lower to 0.56 lower)   | 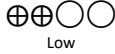<br>Low | CRITICAL   |
| <b>Pain at 6 hours (Scale from: 0 to 10)</b>  |                   |              |                      |              |                           |                      |                            |                      |                                                     |                                                                                            |            |
| 3                                             | randomised trials | not serious  | serious <sup>a</sup> | not serious  | very serious <sup>b</sup> | none                 | 130                        | 120                  | MD <b>0.52 lower</b><br>(1.04 lower to 0.01 higher) | <br>Low | CRITICAL   |
| <b>Pain at 24 hours (Scale from: 0 to 10)</b> |                   |              |                      |              |                           |                      |                            |                      |                                                     |                                                                                            |            |
| 3                                             | randomised trials | not serious  | serious <sup>a</sup> | not serious  | very serious <sup>b</sup> | none                 | 127                        | 120                  | MD <b>0.31 lower</b><br>(0.82 lower to 0.19 higher) | <br>Low | CRITICAL   |

Note. CI = confidence interval; MD = mean difference.

**Explanations**

a. at one hour I<sup>2</sup> was 74% (50 – 90%), and at six and 24 hours I<sup>2</sup> was measured as 0% due to the difference crossing zero.

b. wide confidence intervals, which crossed zero at six and 24 hours, and small sample sizes.
