# Supplementary material for: Analgesic effect of local anaesthetic in haemorrhoid banding: systematic review and meta-analysis
Source: Springer Nature journal article supplement (doi:10.1007/s00384-024-04609-8), 2024-03-04

**Journal:** International Journal of Colorectal Disease

**Article title:** Analgesic effect of local anaesthetic in haemorrhoid banding: systematic review and meta-analysis

**Authors:** Eleanor G R Watson<sup>1\*</sup>, Hwa Ian Ong<sup>2</sup>, Nicholas J W Shearer<sup>3</sup>, Philip J Smart<sup>2</sup>, Adele N Burgess<sup>2</sup>, David M Proud<sup>2</sup>, Helen M Mohan<sup>2</sup>

<sup>1</sup>University of Melbourne (Faculty of Medicine, Dentistry and Health Sciences), Melbourne (VIC), Australia.

<sup>2</sup>Austin Hospital (Department of Surgery), Melbourne (VIC), Australia.

<sup>3</sup>Royal Melbourne Hospital (Department of Anaesthesia), Melbourne (VIC), Australia.

\*Corresponding author

E-mail: [egwatson@student.unimelb.edu.au](mailto:egwatson@student.unimelb.edu.au)

ORCID: 0000-0003-3614-5132

Twitter: @dreleanorwatson

(a)

As percentage (intention-to-treat)

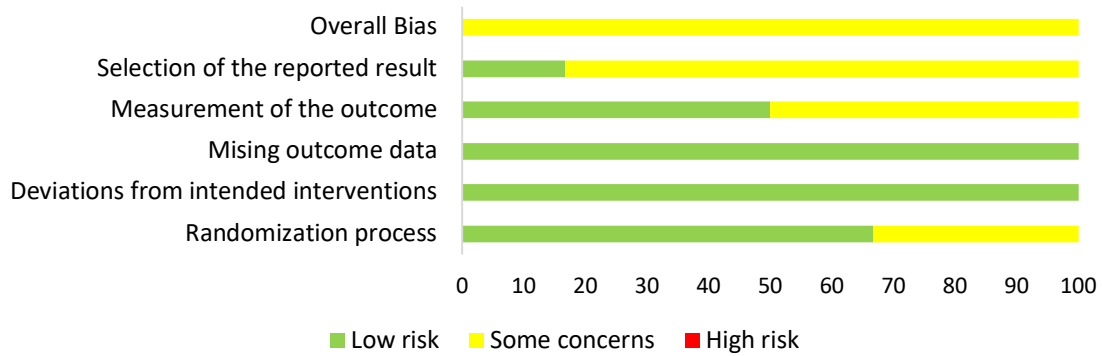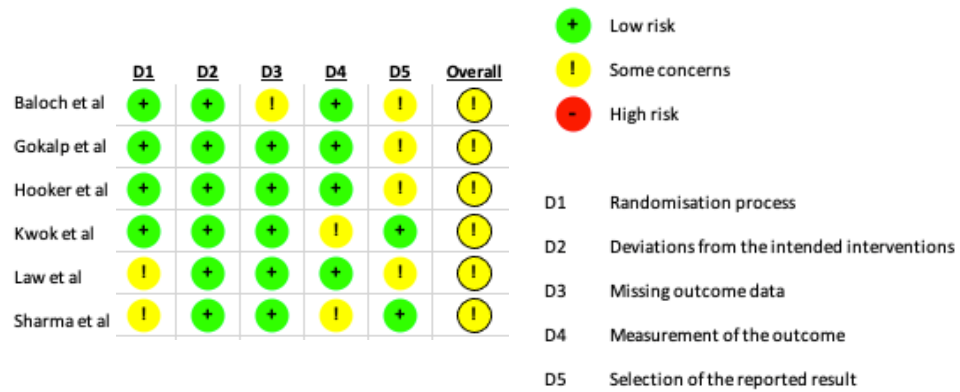

(b)

As percentage (intention-to-treat)

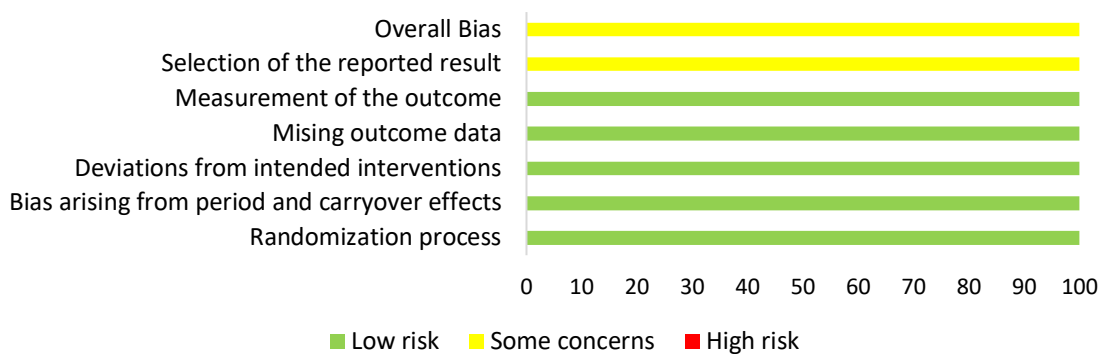

Supplement: MOESM4 [file 26808580]
